# Supplementary material for: Development of Climate Smart Fruit Plants via CRISPR/Cas Genome Editing Systems: A Spatiotemporal Review
Source: Preprints.org preprint supplement (doi:10.20944/preprints202305.1887.v1), 2023-05-26
Supplement: Supplementary file 1 [file supplementary]

Archive with 2 entries (2 files):
- Supplementary File 2.xlsx
- Supplementary File 1.xlsx
