# Supplementary material for: Development of Climate Smart Fruit Plants via CRISPR/Cas Genome Editing Systems: A Spatiotemporal Review
Source: Preprints.org preprint supplement (doi:10.20944/preprints202305.1887.v1), 2023-05-26
Supplement: Supplementary file 1 [file supplementary › Supplementary File 1.xlsx]

## Sheet: Sheet1
Table S1: Major Fruits and their Genome Sequence Information
Fruits Name	Plant Species	Estimaed Number of Genes	Estimated Genome Size	Relevant Database	Web Address	Reference(s)
Almond	Prunus dulcis	27969	238 Mb	GDR	https://www.rosaceae.org/species/prunus/prunus_dulcis	(Alioto et al., 2020)
Apple	Malus × domestica	57386	742.3 Mb	The Apple Genome	https://iris.angers.inra.fr/gddh13/	(Velasco et al., 2010)
Apricot	Prunus armeniaca	2794	220.36−220.56 Mb	GDR	https://www.rosaceae.org/species/prunus/prunus_armeniaca	(F. Jiang et al., 2019)
Banana	Musa paradisiaca	36000	523 Mb	MusaBase	https://musabase.org/	(Dash & Rai, 2016)
Cocoa	Theobroma cacao	28798	411-494 Mb	Cacao Genome Database	https://www.cacaogenomedb.org/	(Argout et al., 2010)
Coconut	Cocos nucifera	28039	2.6 Gb	Coconut Genome Browser	http://sinin.kps.ku.ac.th/cocobrowser/	(Lantican et al., 2019; Xiao et al., 2017)
Coffee	Coffea arabica	46, 562	1.3 Gb	Coffee Genome Hub	http://www.coffee-genome.org/	(Scalabrin et al., 2020)
Date Palm	Phoenix dactylifera	41660	605.4 Mb	DRDB (Date palm genome database)	http://drdb.big.ac.cn/home	(Al-Mssallem et al., 2013; Z. He et al., 2017)
European Pear	Pyrus communis ‘Bartlett’	43419	577.3 Mb	GDR	https://www.rosaceae.org/pub/8739	(Chagné et al., 2014)
Fig	Ficus carica	17355	259–393 Mb	EnsemblPlants	https://plants.ensembl.org/Ficus_carica/Info/Index	(Mori et al., 2017)
Guava	Psidium guajava	84206	~ 450 Mb	Taxonomy Browser (NCBI)	https://www.ncbi.nlm.nih.gov/Taxonomy/Browser/wwwtax.cgi?id=120290	(Mittal et al., 2020)
Japanese Persimmon	Diospyros kaki	25199	856.41 Mb	Persimmon Genome Database	http://persimmon.kazusa.or.jp/	(Q. gang Zhu et al., 2019)
Kiwi Fruits	Actinidia deliciosa	39040	616.1 Mb	Kiwifruits Genome Database	https://kiwifruitsgenome.org/	(Huang et al., 2013)
Lychee	Litchi chinensis	13517	554 Mb	Taxonomy Browser (NCBI)	https://www.ncbi.nlm.nih.gov/Taxonomy/Browser/wwwtax.cgi?id=151069	(G. Hu et al., 2022)
Mango	Mangifera indica	26616	~ 439 Mb	MangoBase	https://mangobase.org/	(Arumuganathan & Earle, 1991; Bally et al., 2021)
Papaya	Carica papaya	28629	372 Mbp	CpGDB	http://www.plantgdb.org/CpGDB/	(Ming et al., 2008)
Peach	Prunus persia	27852	265 Mb	GDR (Genome Database for Rosaceae)	https://www.rosaceae.org/species/prunus/all	(Verde et al., 2013)
Pear	Pyrus bretscheideri	42812	512.0Mb	GDR	https://www.rosaceae.org/species/pyrus/all	(Wu et al., 2013)
Pineapple	Ananas comosus	31893	526 Mb	PGD (Pineapple Genomics Database)	http://pineapple.angiosperms.org/pineapple/html/index.html	(Ming et al., 2015; H. Xu et al., 2018)
Plum	Prunus domestica	24448	284.2 Mb	GDR	https://www.rosaceae.org/species/prunus_domestica/genome_v1.0.a1	(Liu et al., 2020)
Pomegranate	Punica granatum	33594	320.31 Mb	Taxonomy Browser (NCBI)	https://www.ncbi.nlm.nih.gov/Taxonomy/Browser/wwwtax.cgi?id=22663	(Luo et al., 2020)
Sweet Cherry	Prunus avium	1044	344.29 Mb	Cherry Genome Database	http://cherry.kazusa.or.jp/	(J. Wang et al., 2020)
Sweet Orange	Citrus sinensis	29445	320.5 Mb	Citrus Genome Database	https://www.citrusgenomedb.org/	(Q. Xu et al., 2012)
Grapevine	Vitis vinifera	30434	~475 Mb	EnsemblPlants	http://plants.ensembl.org/Vitis_vinifera/Info/Index	(Jaillon et al., 2007)
Walnut	Juglans regia	32498	667 Mb	EnsemblPlants	https://plants.ensembl.org/Juglans_regia/Info/Index	(Martínez-García et al., 2016)
White Mulberry	Morus alba	29338	330 Mb	MorusDB	https://morus.swu.edu.cn/	(N. He et al., 2013)
