# Supplementary material for: Development of Climate Smart Fruit Plants via CRISPR/Cas Genome Editing Systems: A Spatiotemporal Review
Source: Preprints.org preprint supplement (doi:10.20944/preprints202305.1887.v1), 2023-05-26
Supplement: Supplementary file 1 [file supplementary › Supplementary File 2.xlsx]

## Sheet: Sheet1
S2: Common Features of Delivery Vehicles for CRISPR/Cas system
Delivery Vehicle	Conformation	Transformation Protocol	Cargo Type	Level of Expertise Required	Advantages	Capacity	Limitations	References
Nucleofection	Electricity	Direct	(Cas9 + sgRNA) mRNA	Low	Prominent method of delivery to a population of cells	(Cas9 + sgRNA) in	Some unaltered cell populations and in vitro limited	(Matano et al., 2015; Ousterout et al., 2015)
						nmol/mL
Microinjection	Precise Needle-mediated	Direct	Protein (RNP), (Cas9 + sgRNA) mRNA	Very High	Most efficient delivery into the cell of interest	(Cas9 + sgRNA) in	in vitro only, laborious and hard to master	(Crispo et al., 2015; J, 1995; Raveux et al., 2017)
						nmol/mL
Hydrodynamic	Injection through extreme pressure (H2O-mediated)	Direct	Protein (RNP)	Intermediate	Cost-efficient and easy with no virus involvement	(Cas9 + sgRNA) in	Somewhat random (non-targeted), may induce tissue damage	(Dong et al., 2015; Guan et al., 2016)
						nmol/mL
Adenovirus	Double-stranded DNA or dsDNA (non-enveloped)	Indirect	Plasmid DNA	High	Efficient delivery method	Nucleic acid (8 kilobases in length)	Very difficult upscaling, Inflammation induction	(Maddalo et al., 2014; Maggio et al., 2016)
Adeno-associated virus (AAV)	Single-stranded DNA or ssDNA (non-enveloped)	Indirect	Plasmid DNA	High	Relatively low immunogenic response induction	Nucleic acid (less than 5 kilobases in length)	Low nucleic acid carrying capacity	(Platt et al., 2014; Tabebordbar et al., 2016; Truong et al., 2015)
Lentivirus	RNA (enveloped)	Indirect	Plasmid DNA	High	Persistent transfer of genes of interest	Nucleic acid (10-18 kilobases in length)	May induce slicing and realignment of transgene	(Koike-Yusa et al., 2013; Roehm et al., 2016)
AuNPs or Gold nanoparticles	Gold nanoparticles with cationic arginine coating	Direct	Protein (RNP)	Intermediate	Analogous to membrane-fusion, non-reactive	(Cas9 + sgRNA) in	Non-specific inflammatory responses	(Mout et al., 2017)
						nmol/mL
Lipoplexes	Lipids (Synthetic, Natural, and Polymers)	Direct	Protein (RNP), (Cas9 + sgRNA) mRNA	Intermediate	Easy manipulation and cost-efficient, virus-free	(Cas9 + sgRNA) in	Cell tropism and cargo degradation (endosomal)	(Ebina et al., 2013; Horii et al., 2014; Kennedy et al., 2014; Schwank et al., 2013; Zuris et al., 2014)
						nmol/mL
DNA nano clews	Spheroid moiety of DNA	Direct	Protein (RNP)	Very high	Virus-free	(Cas9 + sgRNA) in	Variations in penetration efficiency	(Sun et al., 2015)
						nmol/mL
Cell-penetrating peptides	Peptides are composed of short sequences of amino acids	Direct	Protein (RNP)	Intermediate	Capable of delivering intact RNPs, virus-free	(Cas9 + sgRNA) in	Template DNA requires specific modifications	(Axford et al., n.d.)
						nmol/mL
iTOP	Compound-mediated transduction with hyperosmolarity	Direct	Protein (RNP)	High	Highly efficient, virus-free	(Cas9 + sgRNA) in	No in vivo applications and non-specificity	(D’Astolfo et al., 2015)
						nmol/mL
Inorganic nanoparticles	Carbon and Silica-based nanoparticle composition	Direct	Nucleic acids and long-chain polypeptides	Intermediate	Inertness	Insufficient data for CRISPR	No proof of CRISPR	(Bates & Kostarelos, 2013)
MENDs	Outer CPP covering with Poly-lysine inner core with a lipid coating	Direct	Nucleic acids	Very high	Modularity and precision delivery	Insufficient data for CRISPR	No proof of CRISPR	(Nakamura et al., 2012)
Mesoporous silica particulates (lipid-coated)	Silica particles with a coating of lipids	Direct	RNA sequences (short) and other small molecules	High	Inertness, site-directed modifications	Insufficient data for CRISPR	No proof of CRISPR	(Gonzalez Porras et al., 2016; Su et al., 2017)
Streptolysin O or SLO	Pore-inducing bacterial toxin	Direct	Complexes and nearly 100 kDa domain proteins	High	More cell viability due to the reversibility of pores	Insufficient data for CRISPR	No proof of CRISPR	(Brito et al., 2008; Teng et al., 2016)
